# Supplementary material for: AFM Characterization of the Internal Mammary Artery as a Novel Target for Arterial Stiffening
Source: Scanning. 2018 Nov 5;2018:6340425. doi: 10.1155/2018/6340425 (PMC6247466; doi:10.1155/2018/6340425)
Supplement: Supplementary Materials — The supplementary material is simply the raw data in an Excel spreadsheet in accordance with the journal's “Data Availability” policy. [file 6340425.f1.xlsx]

## Sheet: Elastic modulus of dehy media
Patient ID	522	549	552	559	565	631	656	693	524	534	573	603	606	620	627	643	1202
E	1875.9	2084	2081.7	1532.76	2674	1378	1361	1217	1897	2376.5	2655.1	3127	2984.3	5736.69	2437	2068.4	2220
	2279.6	2798	2494.5	1829.41	2501	1383	1836	1363	4122	2520.8	2414.7	3126	3129.4	2049	2546	2483.67	2426
	1942.5	2586.8	2902	2016.67	2588	2338	2137	1369	4793	2146.5	3931	3363	2341.4	1792	2465	2976.06	2323
	3367	2795.4	1951.89	1792.57	3235	1133	2329	1379	4487	4746.6	2662.1	2691	3452	3905.88	2432	2866.75	2975
	3352	2683.8	2140.21	1912.53	2994	1274	2074	1099	4577	4298.9	3048.9	2333	3271	4444.68	2894	2979.01	3107
	2422.8	2629.5	2105.88	2324.94	2632	1559	2294	1526	4304	4991.5	4447.6	2459	3089	5599.66	2348	3107.57	2866

## Sheet: Elastic modulus of dehy med+ad
Patient ID	522	549	552	559	565	631	656	693	524	534	573	603	606	620	627	643	1202
E	1875.9	2084	2081.7	1532.76	2674	1378	1361	1217	1897	2376.5	2655.1	3127	2984.3	5736.69	2437	2068.4	2220
	2279.6	2798	2494.5	1829.41	2501	1383	1836	1363	4122	2520.8	2414.7	3126	3129.4	2049	2546	2483.67	2426
	1942.5	2586.8	2902	2016.67	2588	2338	2137	1369	4793	2146.5	3931	3363	2341.4	1792	2465	2976.06	2323
	3367	2795.4	1951.89	1792.57	3235	1133	2329	1379	4487	4746.6	2662.1	2691	3452	3905.88	2432	2866.75	2975
	3352	2683.8	2140.21	1912.53	2994	1274	2074	1099	4577	4298.9	3048.9	2333	3271	4444.68	2894	2979.01	3107
	2422.8	2629.5	2105.88	2324.94	2632	1559	2294	1526	4304	4991.5	4447.6	2459	3089	5599.66	2348	3107.57	2866
	2302.7	1825	1728.84	1729.95	1507	1665	1065	1561	2623	2150	2230	2083	2720	2310	2134	2566.04	1940
	2370.1	2398.9	1870	1806.21	1574	1765	1100	1937	2667	2364	2239	2137	2987	2377	2251	3403.3	2160
	2395.8	2722.2	2151	1850.26	1764	1792	1116	1993	2725	2470.5	2606	2141	3463.57	2675	2866	3200.1	2249
	2688.6	2768	2373.3	2095.22	2214	2103	1938	2249	3361	3262.3	3059.2	2334	3605	2725.8	2920	4124.85	2497
	2693	2780.2	2476.9	2114.39	2276	2140	2792	2360	3583	3430.1	4003.8	2390	3668.7	2984.76	3008	3357.27	2565
	2821.6	3126.4	2806.1	2824.94	2446	2189	2975	2404	4098	3610.4	4374.6	2555	3891	3406.54	3358	3842.21	2590

## Sheet: Elastic modulus of hydr media
Patient ID	522	549	559	565	631	656	693	524	534	573	603	606	627	1202
E	196.7	242	109	432.5	119.4	190.4	409.4	705.4	1014	726	105.2	560	713.9	760.2
	233.3	152.6	289.4	409.9	317.1	116.1	333.3	452.5	812.6	837.1	262.9	654.7	707.5	2243.1
	262.8	342.1	279.4	340.8	347.3	282.5	246	546.4	941	912.2	405.7	615.2	452.3	1077.2
	436.7	85.1	109	115.5	145.5	257.7	152.9	550.3	1507.6	664.7	392.5	724.7	597.8	1039.2
	228.2	151.7	289.4	94.9	219	441.7	199.4	505.7	1197.7	522.7	273.9	688.3	587.9	582.3
	398.6	107.1	279.4	154.8	354.5	462.2	191.3	788.8	1215.3	632.3	279.1	654.7	587.3	811.9

## Sheet: Elasticity data
		n	Mean	Median	SD	SE	Skewness	Kurtosis
Hydrated media (kPa)	Low PWV	7	250.5	255.4	39.1	14.8	-0.9	0.8
	High PWV	7	721.7	649.6	291.9	110.3	0.2	-0.4
Dehydrated media (MPa)	Low PWV	8	2116.2	2142.3	523.1	184.9	-0.3	-1.2
	High PWV	9	3163.6	3044.5	548.7	182.9	0.6	-1.1

## Sheet: SLRPs for available patients
Patient ID	Lumican	Mimecan	Prolargin	Asporin	Podocan	Decorin	Biglycan
522	1.077	1.133	1.366	1.418	1.116	1.16	0.881
559	1.573	1.15	1.664	1.741	1.351	1.716	1.099
565	1	1.293	0.939	0.862	0.897	0.82	0.964
631	1.338	1.013	1.421	1.15	1.538	1.468	0.92
656	1.218	1.105	1.26	1.415	1.146	1.208	1.172
693	0.959	0.85	0.926	0.975	1.068	0.882	0.973
524	1.086	1.101	1.1	0.927	1.17	1.219	0.982
534	0.747	0.849	0.713	0.78	0.726	0.575	0.713
603	1.376	1.099	1.242	1.086	1.856	1.671	1.093
606	0.971	0.911	0.885	1.049	0.9	0.94	1.074
627	0.726	0.79	1.031	0.958	1.13	0.73	0.988
1202	0.872	0.893	0.781	0.711	1.119	0.842	1.012

## Sheet: Data for PCA
Patient ID	PWV	Age	BMI	HbA1c	Cholesterol	E-Me	E-Ad	E-Me+Ad	E-Hy	Lumican	Mimecan	Prolargin	Asporin	Podocan	Decorin	Biglycan
522	7.9	73.2	26	0.056	3.5	2539.97	2545.3	2542.6	292.717	1.077	1.133	1.366	1.418	1.116	1.16	0.881
565	9.1	66.3	24	0.054	4.8	2770.67	1963.5	2367.1	258.067	1	1.293	0.939	0.862	0.897	0.82	0.964
631	8.8	67.7	26	0.053	4.1	1510.83	1942.33	1726.6	250.467	1.338	1.013	1.421	1.15	1.538	1.468	0.92
656	8.1	49.1	31	0.058	4.6	2005.17	1831	1918.1	291.767	1.218	1.105	1.26	1.415	1.146	1.208	1.172
693	9	74.6	19	0.058	3.6	1325.5	2084	1704.8	255.383	0.959	0.85	0.926	0.975	1.068	0.882	0.973
524	13.8	64.4	26	0.055	3.8	4030	3176.17	3603.1	591.517	1.086	1.101	1.1	0.927	1.17	1.219	0.982
534	12.5	61.9	30	0.054	6.5	3513.47	2881.22	3197.3	1114.7	0.747	0.849	0.713	0.78	0.726	0.575	0.713
603	13.8	67.4	36	0.061	3.4	2849.83	2273.33	2561.6	286.55	1.376	1.099	1.242	1.086	1.856	1.671	1.093
606	10	69.6	31	0.058	3.8	3044.52	3389.21	3216.9	649.6	0.971	0.911	0.885	1.049	0.9	0.94	1.074
627	16.2	72.6	33	0.059	6.5	2520.33	2756.17	2638.3	607.783	0.726	0.79	1.031	0.958	1.13	0.73	0.988
1202	10.9	74.8	29	0.057	3.8	2652.83	2333.5	2493.2	1085.65	0.872	0.893	0.781	0.711	1.119	0.842	1.012
